# Supplementary material for: Exploring Valid Reference Genes for Quantitative Real-time PCR Analysis in Plutella xylostella (Lepidoptera: Plutellidae)
Source: PubMed Central journal article supplement — Int J Biol Sci. 2013 Aug 20;9(8):792–802. doi: 10.7150/ijbs.5862 (PMC3753443; doi:10.7150/ijbs.5862), 2013-08-20
Supplement: ijbsv09p0792s1.pdf [file ijbsv09p0792s1.pdf]

## SUPPLEMENTARY MATERIALS

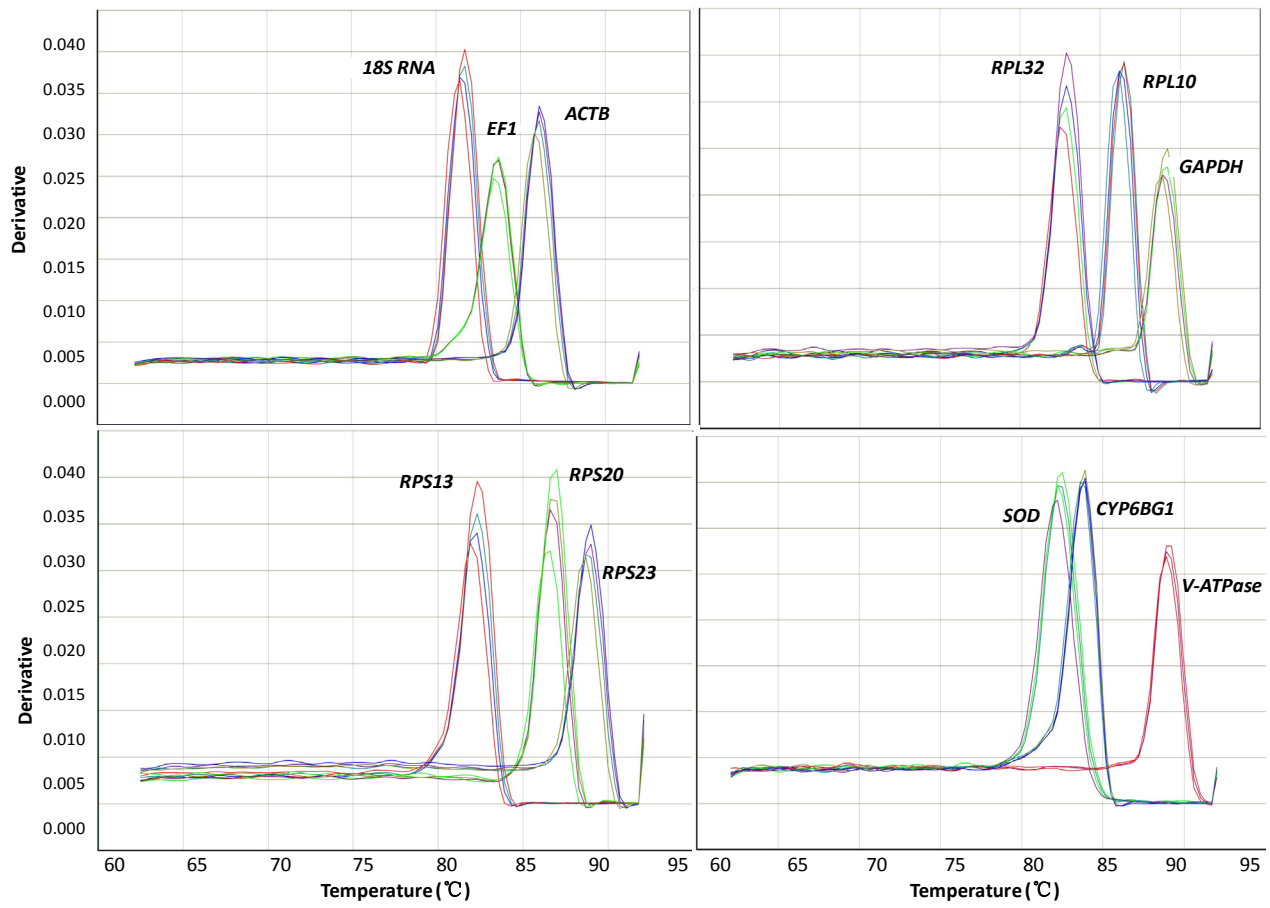

Figure S1. Melting curves of candidate reference genes in *Plutella xylostella*.

**Table S1. qRT-PCR analysis in *Plutella xylostella*<sup>a</sup>.**

| Experimental Condition           | N <sup>b</sup> | P <sup>c</sup> (%) | Reference Gene | N <sup>b</sup> | P <sup>c</sup> (%) |
|----------------------------------|----------------|--------------------|----------------|----------------|--------------------|
| Development stage and tissue     | 8              | 45                 | <i>ACTB</i>    | 10             | 55                 |
| Susceptible and resistant strain | 4              | 22                 | <i>GAPDH</i>   | 3              | 17                 |
| siRNA injection                  | 2              | 11                 | <i>RPL32</i>   | 3              | 17                 |
| Heat or other stress             | 4              | 22                 | <i>RPS13</i>   | 2              | 11                 |

<sup>a</sup>Based on Google Scholar (<http://scholar.google.com/>), 18 research papers included qRT-PCR analysis in *Plutella xylostella*.

<sup>b</sup>Number of publications.

<sup>c</sup>Percentage of publications utilizing each reference gene.
